# Supplementary material for: Inhibitory cell populations depend on age, sex, and prior experience across a neural network for Critical Period learning
Source: PubMed Central journal article supplement (PMC6934704; doi:10.1038/s41598-019-56293-2), 2019-12-27
Supplement: 41598_2019_56293_MOESM1_ESM.pdf [file 41598_2019_56293_MOESM1_ESM.pdf]

# Inhibitory cell populations depend on age, sex, and prior experience across a neural network for Critical Period learning

Joseph V Gogola, Elisa O Gores, Sarah E London

## Supplementary tables

Tables of qualitative brain-wide expression mapping.

| <b>Table</b>                                                                   | <b>page</b> |
|--------------------------------------------------------------------------------|-------------|
| Abbreviations for neuroanatomical nomenclature used in subsequent tables ..... | 2           |
| Whole brain GAD65 mapping .....                                                | 3           |
| Song network GAD65 mapping .....                                               | 4           |
| Whole brain parvalbumin mapping .....                                          | 5           |
| Song network parvalbumin mapping .....                                         | 6           |
| Song area cell densities and area of region analyzed .....                     | 7           |

| <b>Telencephalon (pallium, subpallium)</b> |                                                   | <b>Diencephalon (thalamus/hypothalamus)</b> |                                                                              | <b>Mesencephalon (midbrain)</b>         |                                                                          |
|--------------------------------------------|---------------------------------------------------|---------------------------------------------|------------------------------------------------------------------------------|-----------------------------------------|--------------------------------------------------------------------------|
| HA                                         | Apical hyperpallium                               | PVM                                         | Paraventricular nucleus                                                      | LM                                      | Lentiform nucleus                                                        |
| HD                                         | Dorsal hyperpallium                               | (PVN)                                       |                                                                              | VTA (AVT)                               | Ventral tegmental area                                                   |
| M                                          | Mesopallium                                       | LHy                                         | Lateral hypothalamus                                                         | Ico/MLd                                 | Intercollicular nucleus/dorsal part of the lateral mesencephalic nucleus |
| N                                          | Nidopallium                                       | GLv                                         | Ventral part of the lateral geniculate nucleus                               | IM/IPC                                  | Magnocellular isthmus nuclei/parvocellular isthmus nuclei                |
| S                                          | Septum                                            | Rot/Rt                                      | Nucleus rotundus                                                             | SGC                                     | Stratum griseum centrale                                                 |
| A                                          | Acropallium                                       | DLA                                         | Anterior nucleus of the dorsolateral thalamus                                | SGP/SGF                                 | Substantia grisea et fibrosa periventricularis                           |
| E                                          | Ectopallium                                       | Ov/ovco                                     | Core of the nucleus ovoidalis                                                | LoC                                     | Locus coeruleus                                                          |
| LSt (PA)                                   | Lateral striatum                                  | DLMco                                       | Core of the medial part of the dorsolateral nucleus of the anterior thalamus | EW                                      | Nucleus of Edinger-Westphal                                              |
| GP (PP)                                    | Globus pallidus                                   | DP/DLP                                      | Dorsolateral nucleus in the posterior thalamus                               | Ru                                      | Red nucleus                                                              |
| SL                                         | Lateral septal nucleus                            | SpM                                         | Medial spiriform                                                             | NIII                                    | Nucleus of III nerve                                                     |
| SM                                         | Medial septal nucleus                             | SpL                                         | Lateral spiriform                                                            | PL/PM                                   | Lateral/medial pons                                                      |
| MSt                                        | Medial striatum                                   | EM                                          | Ectomamillary nucleus                                                        | nIV                                     | Nucleus of IV nerve                                                      |
| Tn                                         | Nucleus taeniae                                   | DMP                                         | Posterior dorsomedial nucleus                                                | FLM                                     | Medial longitudinal fascicle                                             |
| B                                          | Nucleus basalis                                   | HM/HL                                       | Medial/lateral habenula                                                      | SN                                      | Substantia nigra                                                         |
| AL                                         | Auditory lobule                                   | SPC                                         | Parvocellular part of the superficial nucleus of the thalamus                | LLD                                     | Dorsal part of the lateral lemniscal nucleus                             |
| LMAN                                       | Magnocellular nucleus of the anterior nidopallium | SP/SPT                                      | Nucleus subpretectalis                                                       | ISo                                     | Isthmo optic nucleus                                                     |
| Area X                                     | Proper name                                       | Pt                                          | Pretectal nucleus                                                            | PAG                                     | Periaqueductal gray                                                      |
| RA                                         | Robust nucleus of the arcopallium                 | SubG                                        | Subgeniculate nucleus                                                        | <b>Metencephalon (pons, cerebellum)</b> |                                                                          |
| HVC                                        | Proper name                                       | ALP                                         | Posterior nucleus of ansa lenticularis                                       | LA                                      | Nucleus laminaris                                                        |
| Field L                                    | Proper name                                       | TSM                                         | Septomesencephalic tract                                                     | FLM                                     | Medial longitudinal fascicle                                             |
| Bas                                        | Basorostral nucleus                               | OvPG                                        | Oval pregeniculate nucleus                                                   | RPgc                                    | Reticular nucleus of caudal pons, gigantocellularis                      |
| OM                                         | Occipitomesencephalic tract                       | Ret                                         | Reticular nucleus of the thalamus                                            | Dcn                                     | Deep cerebellar nuclei                                                   |
| CDLco                                      | Core of the dorsolateral corticoid area           | SRT                                         | Nucleus subrotundus                                                          | Vest                                    | Vestibular nuclei                                                        |
| Alat                                       | Lateral acropallium                               | EPD                                         | Dorsal part of the entopeduncular nucleus                                    | MC                                      | Magnocellular nucleus                                                    |
|                                            |                                                   | VMH                                         | Ventromedial nucleus of the hypothalamus                                     | Ang                                     | Angular nucleus                                                          |
|                                            |                                                   | DMA                                         | Dorsomedial nucleus of the anterior thalamus                                 | nV                                      | Principle sensory nucleus of the trigeminal nerve                        |
|                                            |                                                   | DLM                                         | dorsolateral thalamus                                                        | n7                                      | Nucleus of the facial nerve                                              |
|                                            |                                                   |                                             |                                                                              | <b>Myelencephalon (medulla)</b>         |                                                                          |
|                                            |                                                   |                                             |                                                                              | Vest                                    | Vestibular nuclei                                                        |

GAD65

| Brain Area | P25    |         |        |         | P45    |         |        |         | P65    |         |        |         |
|------------|--------|---------|--------|---------|--------|---------|--------|---------|--------|---------|--------|---------|
|            | Male   |         | Female |         | Male   |         | Female |         | Male   |         | Female |         |
|            | Normal | Isolate | Normal | Isolate | Normal | Isolate | Normal | Isolate | Normal | Isolate | Normal | Isolate |
| HA         | +++    | +++     | +++    | +++     | +++    | +++     | +++    | +++     | +++    | +++     | +++    | +++     |
| M          | +++    | +++     | +++    | +++     | +++    | +++     | +++    | +++     | +++    | +++     | +++    | +++     |
| HD         | +++    | +++     | +++    | +++     | +++    | +++     | +++    | +++     | +++    | +++     | +++    | +++     |
| N          | +++    | +++     | +++    | +++     | +++    | +++     | +++    | +++     | +++    | +++     | +++    | +++     |
| GP (PP)    | +++    | ++      | ++     | ++      | +++    | ++      | ++     | +++     | +++    | +++     | ++     | +++     |
| LSt (PA)   | ++     | ++      | +++    | +++     | +++    | ++      | +++    | ++      | ++     | ++      | +++    | +++     |
| MSt        | +++    | +++     | +++    | +++     | +++    | +++     | +++    | +++     | +++    | +++     | +++    | +++     |
| SL         | +      | +       | +      | +       | +      | +       | +      | +       | +      | +       | +      | +       |
| SM         | +      | +       | +      | +       | +      | +       | +      | +       | +      | +       | +      | +       |
| A          | +++    | +++     | +++    | +++     | +++    | +++     | +++    | +++     | +++    | +++     | +++    | +++     |
| Tn         | +++    | +++     | +++    | +++     | +++    | +++     | +++    | +++     | +++    | +++     | +++    | +++     |
| E          | ++     | ++      | ++     | ++      | ++     | ++      | ++     | ++      | ++     | ++      | ++     | ++      |
| B          | +      | +       | +      | +       | +      | +       | +      | +       | +      | +       | +      | +       |
| PVM (PVN)  | +      | +       | +      | +       | +      | +       | +      | +       | ++     | ++      | ++     | +       |
| LHy        | ++     | +       | ++     | ++      | +      | ++      | ++     | +       | ++     | ++      | ++     | ++      |
| GLv        | +++    | +       | +++    | +       | +++    | +++     | +++    | +++     | +      | +       | ++     | +++     |
| Rot/Rt     | --     | --      | --     | --      | --     | --      | --     | --      | --     | --      | --     | --      |
| LA         | --     | --      | --     | --      | --     | --      | --     | --      | --     | --      | --     | --      |
| DLA        | +      | ++      | +      | +       | +      | +       | ++     | +       | +      | +       | +      | +       |
| Ov/ovco    | --     | --      | --     | --      | --     | --      | --     | --      | --     | --      | --     | --      |
| DLMco      | --     | --      | --     | --      | --     | --      | --     | --      | --     | --      | --     | --      |
| DP/DLP     | --     | --      | --     | --      | --     | --      | --     | --      | --     | --      | --     | --      |
| SpM        | --     | --      | --     | --      | --     | --      | --     | --      | --     | --      | --     | --      |
| S          | +      | ++      | ++     | ++      | +      | +       | +      | +       | ++     | ++      | +      | +       |
| SpL        | ++     | ++      | ++     | ++      | ++     | ++      | +++    | ++      | ++     | ++      | ++     | +       |
| EM         | +++    | +       | ++     | +       | ++     | ++      | ++     | ++      | ++     | ++      | ++     | ++      |
| DMP        | --     | --      | --     | --      | --     | --      | --     | --      | --     | --      | --     | --      |
| DLM        | --     | --      | --     | --      | --     | --      | --     | --      | --     | --      | --     | --      |
| LM         | ++     | +       | +      | +       | +      | +       | ++     | ++      | ++     | ++      | +      | +       |
| VTA (AVT)  | +      | +       | ++     | +       | +      | +       | +      | +       | ++     | ++      | +      | +       |
| Ico/MLd    | +++    | ++      | +++    | +++     | +++    | +++     | +++    | +++     | +++    | +++     | ++     | +++     |
| IM/IPC     | +++    | +++     | +++    | +++     | +++    | +++     | +++    | +++     | +++    | +++     | +++    | +++     |
| HM/HL      | --     | --      | --     | --      | --     | --      | --     | --      | --     | --      | --     | --      |
| SGC        | +      | +       | +      | +       | +      | +       | +      | +       | ++     | +       | +      | +       |
| SGP/SGF    | ++     | +       | ++     | +       | ++     | ++      | +      | +       | ++     | ++      | +      | +       |
| SPC        | --     | --      | --     | --      | --     | --      | --     | --      | --     | --      | --     | --      |
| SP/SPT     | +++    | ++      | +++    | ++      | +++    | ++      | ++     | ++      | ++     | ++      | +++    | ++      |
| Pt         | ++     | ++      | ++     | ++      | ++     | ++      | +++    | +++     | +++    | +++     | ++     | ++      |
| EW         | ++     | ++      | ++     | ++      | ++     | ++      | ++     | ++      | ++     | ++      | +      | ++      |
| Ru         | +      | +       | +      | +       | +      | +       | +      | +       | +      | +       | +      | +       |
| NIII       | --     | --      | --     | --      | --     | --      | --     | +       | --     | +       | +      | --      |
| PL/PM      | --     | +       | --     | --      | --     | --      | +      | +       | --     | +       | --     | +       |
| nIV        | --     | --      | --     | --      | --     | --      | --     | --      | --     | --      | --     | --      |
| FLM        | --     | --      | --     | --      | --     | --      | --     | --      | --     | --      | --     | --      |
| LoC        | ++     | ++      | ++     | ++      | ++     | ++      | +      | ++      | +      | ++      | ++     | +       |
| RPgc       | +      | +       | +      | +       | +      | +       | +      | +       | ++     | +       | +      | +       |
| dcn        | ++     | +       | +++    | +       | +      | +       | +      | +++     | +++    | +++     | +      | +++     |
| vest       | ++     | ++      | ++     | ++      | ++     | ++      | ++     | ++      | +      | ++      | ++     | ++      |
| AL         | +++    | +++     | +++    | +++     | +++    | +++     | +++    | +++     | +++    | +++     | +++    | +++     |
| LMAN       | +++    | +++     | +++    | +++     | +++    | +++     | +++    | +++     | +++    | +++     | +++    | +++     |
| Area X     | +++    | +++     | X      | X       | +++    | +++     | X      | X       | +++    | +++     | X      | X       |
| RA         | +++    | +++     | +++    | +++     | +++    | +++     | +++    | +++     | +++    | +++     | +++    | +++     |
| HVC        | +++    | +++     | +++    | +++     | +++    | +++     | +++    | +++     | +++    | +++     | +++    | +++     |
| Field L    | +++    | +++     | +++    | +++     | +++    | +++     | +++    | +++     | +      | +++     | +++    | ++      |
| Bas        | ++     | ++      | ++     | ++      | +++    | ++      | ++     | ++      | ++     | ++      | ++     | ++      |
| SN         | ++     | ++      | ++     | +++     | +++    | ++      | ++     | ++      | ++     | ++      | ++     | ++      |
| MC         | --     | --      | --     | --      | +      | +       | --     | --      | --     | --      | --     | --      |
| SubG       | ++     | ++      | ++     | +       | ++     | ++      | ++     | ++      | ++     | ++      | ++     | ++      |
| Ang        | --     | --      | --     | --      | --     | --      | --     | --      | --     | --      | --     | --      |
| nV         | --     | +       | --     | --      | --     | --      | --     | --      | --     | --      | --     | --      |
| ALP        | +++    | ++      | +++    | +++     | +++    | ++      | +++    | +++     | +++    | +++     | +++    | +++     |
| LLD        | ++     | ++      | ++     | +       | ++     | ++      | +      | +       | +      | ++      | ++     | ++      |
| TSM        | --     | --      | --     | --      | --     | --      | --     | --      | --     | --      | --     | --      |
| OvPG       | ++     | ++      | ++     | ++      | ++     | ++      | +++    | ++      | ++     | ++      | ++     | ++      |
| Ret        | +++    | +++     | +++    | +++     | +++    | +++     | +++    | +++     | +++    | +++     | +++    | +++     |
| ISo        | --     | --      | --     | --      | --     | --      | --     | --      | --     | --      | --     | --      |
| n7         | +      | +       | ++     | +       | +      | +       | +      | +       | +      | +       | +      | +       |
| SRt        | +      | +       | ++     | +       | +      | ++      | ++     | ++      | ++     | +       | +      | +       |
| OM         | +      | --      | +      | X       | --     | --      | --     | X       | --     | X       | --     | --      |
| CDLco      | +      | +       | +      | +       | +      | +       | +      | +       | +      | +       | +      | +       |
| EPD        | +      | +       | ++     | +       | +      | +       | +      | +       | +      | +       | +      | +       |
| PAG        | ++     | ++      | ++     | ++      | ++     | ++      | ++     | ++      | ++     | ++      | ++     | ++      |
| VMH        | +      | +       | +      | +       | +      | +       | +      | +       | +      | +       | X      | +       |
| Alat       | +++    | +++     | +++    | +       | +++    | +++     | +++    | +++     | +++    | +++     | +++    | +++     |

| Key                                  | Standards     |
|--------------------------------------|---------------|
| + = majority of stained cells        | + = SM        |
| (+) = staining on some cells in area | ++ = LSt (PA) |
| X = area obscured                    | +++ = Ret     |

| Brain Area | GAD65  |         |        |         |        |         |        |         |        |         |        |         |
|------------|--------|---------|--------|---------|--------|---------|--------|---------|--------|---------|--------|---------|
|            | P25    |         |        |         | P45    |         |        |         | P65    |         |        |         |
|            | Male   |         | Female |         | Male   |         | Female |         | Male   |         | Female |         |
|            | Normal | Isolate | Normal | Isolate | Normal | Isolate | Normal | Isolate | Normal | Isolate | Normal | Isolate |
| AL         | +++    | +++     | +++    | +++     | +++    | +++     | +++    | +++     | +++    | +++     | +++    | +++     |
| LMAN       | +++    | +++     | +++    | +++     | +++    | +++     | +++    | +++     | +++    | +++     | +++    | +++     |
| Area X     | +++    | +++     | x      | x       | +++    | +++     | x      | x       | +++    | +++     | x      | x       |
| RA         | +++    | +++     | +++    | +++     | +++    | +++     | +++    | +++     | +++    | +++     | +++    | +++     |
| HVC        | +++    | +++     | +++    | +++     | +++    | +++     | +++    | +++     | +++    | +++     | +++    | +++     |
| Area L     | +++    | +++     | +++    | +++     | +++    | +++     | ++     | +++     | +      | +++     | +++    | ++      |

| Key                                  | Standards     |
|--------------------------------------|---------------|
| + = majority of stained cells        | + = SM        |
| (+) = staining on some cells in area | ++ = LSt (PA) |
| X = area obscured                    | +++ = Ret     |

| Brain Area | Parvalbumin |         |        |         |        |         |        |         |         |         |         |         |
|------------|-------------|---------|--------|---------|--------|---------|--------|---------|---------|---------|---------|---------|
|            | P25         |         |        |         | P45    |         |        |         | P65     |         |         |         |
|            | Male        |         | Female |         | Male   |         | Female |         | Male    |         | Female  |         |
|            | Normal      | Isolate | Normal | Isolate | Normal | Isolate | Normal | Isolate | Normal  | Isolate | Normal  | Isolate |
| HA         | +           | +       | +      | +       | +      | +       | +      | +       | +       | +       | +       | +       |
| M          | +           | +       | +      | +       | +      | +       | +      | +       | +       | +       | +       | +       |
| HD         | +           | +       | +      | +       | +      | +       | +      | +       | +       | +       | +       | +       |
| N          | +           | +       | +      | +       | +      | +       | +      | +       | +       | +       | +       | +       |
| GP (PP)    | ++          | ++      | ++     | ++      | ++     | ++      | ++     | ++      | ++      | +++     | ++      | ++      |
| LSt (PA)   | ++          | ++      | +      | ++      | ++     | ++      | ++     | ++      | ++      | ++      | ++      | ++      |
| MSt        | +           | +       | +      | +       | +      | +       | +      | +       | +       | +       | +       | +       |
| SL         | --          | --      | --     | --      | --     | --      | --     | --      | --      | --      | --      | --      |
| SM         | ++          | +       | +      | +       | ++     | +       | ++     | +       | +       | +       | +       | ++      |
| A          | +           | +       | +      | +       | +      | +       | +      | +       | +       | +       | +       | +       |
| Tn         | +           | +       | +      | +       | +      | +       | +      | +       | +       | +       | +       | +       |
| E          | ++          | ++      | ++     | ++      | ++     | ++      | ++     | ++      | ++      | ++      | ++      | ++      |
| B          | --          | --      | --     | --      | --     | --      | --     | --      | --      | --      | --      | --      |
| PVM (PVN)  | --          | --      | --     | --      | --     | --      | --     | --      | --      | --      | --      | --      |
| LHy        | --          | --      | --     | --      | --     | --      | --     | --      | --      | --      | --      | --      |
| GLv        | +           | +       | +      | +       | +      | +       | +      | +       | +       | +       | +       | +       |
| Rot/Rt     | +++         | +++     | +++    | +++     | +++    | +++     | +++    | +++     | +++     | ++      | +++     | +++     |
| LA         | --          | +       | +      | --      | +      | +       | +      | +       | +       | +       | --      | +       |
| DLA        | +           | +       | +      | +       | +      | +       | +      | +       | +       | +       | +       | +       |
| Ov/ovco    | +           | +       | +      | +       | +      | +       | +      | +       | +       | +       | +       | +       |
| DLMco      | --          | --      | --     | --      | --     | --      | +      | --      | +       | +       | --      | +       |
| DP/DLP     | +           | +       | +      | +       | ++     | +       | ++     | ++      | ++      | ++      | ++      | ++      |
| SpM        | +           | --      | +      | --      | ++     | +       | --     | +       | +       | +       | +       | +       |
| SpL        | ++          | ++      | +++    | ++      | +++    | +++     | +++    | ++      | ++      | ++      | ++      | ++      |
| EM         | +           | +       | +      | +       | ++     | ++      | ++     | ++      | ++      | ++      | +       | ++      |
| DMP        | --          | --      | --     | --      | --     | --      | --     | --      | --      | --      | --      | --      |
| LM         | +           | +       | +      | +       | +      | +       | +      | +       | +       | +       | +       | +       |
| VTA (AVT)  | --          | --      | --     | --      | --     | --      | --     | --      | --      | --      | --      | --      |
| Ico/MLd    | +(++)       | +(++)   | +(++)  | +(++)   | +(++)  | +(++)   | +(++)  | +(++)   | +(++)   | +(++)   | +(++)   | +(++)   |
| IM/IPC     | +++         | +++     | +++    | +++     | +++    | +++     | +++    | +++     | +++     | +++     | +++     | +++     |
| HM/HL      | --          | --      | --     | --      | +      | --      | --     | --      | --      | --      | --      | --      |
| SGC        | ++          | ++      | ++     | +       | ++     | ++      | +      | ++      | ++      | ++      | ++      | +       |
| SGP/SGF    | ++          | ++      | ++     | +       | ++     | ++      | +      | ++      | ++      | ++      | ++      | ++      |
| SPC        | --          | --      | --     | --      | --     | --      | --     | --      | --      | --      | --      | --      |
| SP/SPT     | +++         | ++      | +++    | ++      | +++    | ++      | +++    | ++      | +++     | +++     | +++     | +++     |
| Pt         | +           | +       | +      | +       | +      | +       | +      | ++      | +       | +       | +       | +       |
| EW         | --          | --      | --     | --      | +      | --      | +      | --      | +       | +       | --      | +       |
| Ru         | --          | +       | +      | +       | +      | +       | +      | +       | +       | --      | --      | +       |
| NIII       | --          | --      | --     | --      | --     | --      | --     | --      | --      | --      | --      | --      |
| PL/PM      | +           | +       | +      | +       | +      | +       | --     | +       | +       | +       | +       | --      |
| nIV        | --          | --      | --     | --      | --     | --      | +      | --      | --      | --      | --      | --      |
| FLM        | --          | --      | --     | +       | --     | --      | --     | --      | --      | --      | --      | --      |
| LoC        | +           | +       | +      | ++      | ++     | ++      | ++     | ++      | ++      | +       | +       | ++      |
| RPgc       | --          | --      | +      | +       | +      | +       | --     | +       | +       | +       | --      | +       |
| dcn        | +           | ++      | ++     | +       | +      | +       | +      | +       | +       | +       | +       | +       |
| vest       | +           | +       | +      | +       | ++     | +       | ++     | ++      | ++      | +       | +       | ++      |
| AL         | --          | +       | --     | --      | +      | --      | +      | --      | --      | --      | --      | +       |
| LMAN       | +           | +       | +      | --      | ++     | +(++)   | +      | ++      | ++(+++) | +(++)   | +       | +       |
| Area X     | +           | +       | X      | X       | ++     | ++      | X      | ++      | ++      | ++      | X       | X       |
| RA         | +           | +       | --     | +       | +++    | ++      | --     | +       | +++     | +++     | --      | --      |
| HVC        | +(++)       | +(++)   | --     | --      | +(+++) | +(+++)  | --     | --      | ++(+++) | ++(+++) | --      | --      |
| Field L    | --          | +       | --     | --      | +(++)  | --      | +      | --      | +       | --      | --      | --      |
| Bas        | +(++)       | +(++)   | +(++)  | ++      | +(++)  | ++      | +(++)  | +(++)   | +(++)   | +(++)   | +(++)   | +(++)   |
| SN         | +           | ++      | ++     | ++      | +(++)  | ++      | ++     | +(++)   | ++      | ++      | +       | +(++)   |
| MC         | +           | +       | ++     | +       | ++     | ++      | +      | +       | ++      | +       | +       | +       |
| SubG       | --          | --      | +      | --      | --     | --      | --     | --      | --      | --      | --      | --      |
| Ang        | ++          | +       | ++     | +       | ++     | ++      | ++     | ++      | ++      | ++      | ++      | ++      |
| nV         | +           | +       | +      | +       | +      | +       | +      | +       | ++      | +       | +       | ++      |
| ALP        | +           | ++      | ++     | +       | +      | +       | ++     | +       | ++      | +       | +       | ++      |
| LLD        | +           | --      | --     | --      | --     | --      | +      | --      | --      | +       | --      | ++      |
| TSM        | --          | --      | --     | --      | --     | --      | --     | --      | --      | --      | --      | --      |
| OvPG       | +           | +       | +      | +       | +      | +       | +      | +       | +       | +       | +       | +       |
| Ret        | +           | +       | +      | --      | +      | +       | --     | +       | +       | --      | +       | +       |
| ISo        | --          | --      | --     | --      | --     | --      | --     | --      | --      | --      | --      | +       |
| n7         | --          | +       | +      | --      | +      | +       | +      | +       | +       | +       | --      | +       |
| SRt        | --          | --      | --     | --      | --     | --      | --     | --      | --      | --      | --      | --      |
| DLM        | --          | --      | --     | --      | --     | --      | --     | --      | --      | --      | --      | --      |
| CDLco      | +           | +       | +      | +       | +      | +       | +      | +       | +       | +       | +       | +       |
| EPD        | --          | --      | --     | --      | --     | --      | --     | --      | --      | --      | --      | --      |
| Alat       | +(+++)      | +       | +(++)  | +(++)   | +(++)  | ++(+++) | +(++)  | +++     | +(++)   | ++(+++) | ++(+++) | +(++)   |
| VMH        | --          | --      | --     | --      | --     | --      | --     | --      | --      | --      | --      | --      |
| PAG        | --          | --      | --     | --      | --     | --      | --     | --      | --      | --      | --      | --      |
| DMA        | --          | --      | --     | --      | --     | --      | --     | --      | --      | --      | --      | --      |

| Key                                       | Standards    |
|-------------------------------------------|--------------|
| + = staining on majority of cells in area | + = HA       |
| (+) = staining on some cells in area      | ++ = E       |
| X = area obscured                         | +++ = IM/IPC |

| Parvalbumin |        |         |        |         |        |         |        |         |         |         |        |         |  |
|-------------|--------|---------|--------|---------|--------|---------|--------|---------|---------|---------|--------|---------|--|
| Brain Area  | P25    |         |        |         | P45    |         |        |         | P65     |         |        |         |  |
|             | Male   |         | Female |         | Male   |         | Female |         | Male    |         | Female |         |  |
|             | Normal | Isolate | Normal | Isolate | Normal | Isolate | Normal | Isolate | Normal  | Isolate | Normal | Isolate |  |
| AL          | --     | +       | --     | --      | +      | --      | +      | +       | --      | --      | --     | +       |  |
| LMAN        | +      | +       | +      | --      | ++     | +(++)   | +      | ++      | ++(+++) | +(++)   | +      | +       |  |
| Area X      | +      | +       | X      | X       | ++     | ++      | X      | X       | ++      | ++      | X      | X       |  |
| RA          | +      | +       | --     | +       | +++    | ++      | --     | +       | +++     | +++     | --     | --      |  |
| HVC         | +(++)  | +(++)   | --     | --      | +(+++) | +(+++)  | --     | --      | ++(+++) | ++(+++) | --     | --      |  |
| Field L     | --     | +       | --     | --      | +(++)  | --      | +      | --      | +       | --      | --     | --      |  |

| Key                                       | Standards    |
|-------------------------------------------|--------------|
| + = staining on majority of cells in area | + = HA       |
| (+) = staining on some cells in area      | ++ = E       |
| X = area obscured                         | +++ = IM/IPC |

| Males                 |                    |                |                | Females               |                    |                |                |
|-----------------------|--------------------|----------------|----------------|-----------------------|--------------------|----------------|----------------|
|                       |                    | Count density  | ROI area       |                       |                    | Count density  | ROI area       |
| <b>age (Normal)</b>   | <b>GAD65</b>       | <b>p value</b> | <b>p value</b> | <b>age (Normal)</b>   | <b>GAD65</b>       | <b>p value</b> | <b>p value</b> |
|                       | Field L            | 0.11           | 0.91           |                       | Field L            | <b>0.03</b>    | 0.67           |
|                       | NCM                | 0.80           | <b>0.03</b>    |                       | NCM                | 0.86           | 0.33           |
|                       | CM                 | 0.70           | 0.38           |                       | CM                 | 0.51           | 0.36           |
|                       | HVC                | 0.61           | <b>0.04</b>    |                       | HVC                | 0.80           | 0.16           |
|                       | RA                 | 0.35           | 0.30           |                       | RA                 | 0.97           | 0.10           |
|                       | LMAN               | 0.52           | 0.99           |                       | LMAN               | 0.52           | 0.60           |
|                       | Area X             | 0.80           | 0.77           |                       |                    |                |                |
| <b>age (Normal)</b>   | <b>parvalbumin</b> |                |                | <b>age (Normal)</b>   | <b>parvalbumin</b> |                |                |
|                       | Field L            | 0.14           | 0.22           |                       | Field L            | 0.89           | 0.33           |
|                       | NCM                | 0.40           | 0.29           |                       | NCM                | 0.80           | 0.76           |
|                       | CM                 | 0.40           | 0.51           |                       | CM                 | 0.37           | 0.15           |
|                       | HVC                | 0.28           | 0.31           |                       | HVC                | 0.81           | 0.46           |
|                       | RA                 | <b>0.01</b>    | 0.08           |                       | RA                 | 0.58           | 0.54           |
|                       | LMAN               | 0.40           | 0.02           |                       | LMAN               | 0.89           | 0.12           |
|                       | Area X             | 0.30           | <b>0.04</b>    |                       |                    |                |                |
| <b>condition</b>      | <b>GAD65</b>       | <b>p value</b> | <b>p value</b> | <b>condition</b>      | <b>GAD65</b>       | <b>p value</b> | <b>p value</b> |
|                       | Field L            | 0.23           | <b>0.02</b>    |                       | Field L            | 0.28           | 0.40           |
|                       | NCM                | 0.37           | 0.81           |                       | NCM                | 0.77           | 0.50           |
|                       | CM                 | 0.36           | 0.43           |                       | CM                 | 0.60           | 0.36           |
|                       | HVC                | 0.80           | 0.11           |                       | HVC                | 0.57           | 0.34           |
|                       | RA                 | 0.95           | 0.74           |                       | RA                 | 0.73           | 0.25           |
|                       | LMAN               | 0.71           | 0.10           |                       | LMAN               | 0.71           | 0.68           |
|                       | Area X             | 0.54           | 0.19           |                       |                    |                |                |
| <b>condition</b>      | <b>parvalbumin</b> |                |                | <b>condition</b>      | <b>parvalbumin</b> |                |                |
|                       | Field L            | 0.15           | 0.09           |                       | Field L            | 0.93           | 0.33           |
|                       | NCM                | 0.56           | 0.21           |                       | NCM                | 0.61           | 0.39           |
|                       | CM                 | 0.50           | 0.19           |                       | CM                 | 0.15           | 0.85           |
|                       | HVC                | 0.35           | 0.24           |                       | HVC                | 0.11           | 0.91           |
|                       | RA                 | 0.30           | 0.50           |                       | RA                 | 0.51           | 0.60           |
|                       | LMAN               | 0.78           | 0.19           |                       | LMAN               | 0.41           | 0.69           |
|                       | Area X             | 0.72           | 0.16           |                       |                    |                |                |
| <b>age* condition</b> | <b>GAD65</b>       | <b>p value</b> | <b>p value</b> | <b>age* condition</b> | <b>GAD65</b>       | <b>p value</b> | <b>p value</b> |
|                       | Field L            | 0.28           | 0.95           |                       | Field L            | <b>0.02</b>    | 0.09           |
|                       | NCM                | 0.92           | 0.42           |                       | NCM                | 0.55           | 0.85           |
|                       | CM                 | 0.79           | 0.25           |                       | CM                 | 0.19           | 0.20           |
|                       | HVC                | 0.76           | 0.33           |                       | HVC                | 0.55           | 0.27           |
|                       | RA                 | 0.81           | 0.60           |                       | RA                 | 0.93           | 0.29           |
|                       | LMAN               | 0.76           | 0.99           |                       | LMAN               | 0.79           | 0.28           |
|                       | Area X             | 0.61           | 0.54           |                       |                    |                |                |

| age*<br>condition              | parvalbumin        |                          |                     | age*<br>condition | parvalbumin |             |      |
|--------------------------------|--------------------|--------------------------|---------------------|-------------------|-------------|-------------|------|
|                                | Field L            | <b>0.01</b>              | 0.14                |                   | Field L     | 0.37        | 0.14 |
|                                | NCM                | 0.20                     | 0.48                |                   | NCM         | 0.32        | 0.33 |
|                                | CM                 | 0.10                     | 0.42                |                   | CM          | <b>0.04</b> | 0.16 |
|                                | HVC                | 0.90                     | 0.90                |                   | HVC         | 0.19        | 0.96 |
|                                | RA                 | 0.68                     | 0.71                |                   | RA          | 0.56        | 0.15 |
|                                | LMAN               | 0.73                     | 0.17                |                   | LMAN        | 0.54        | 0.50 |
|                                | Area X             | 0.55                     | 0.80                |                   |             |             |      |
|                                |                    |                          |                     |                   |             |             |      |
| <b>Males &amp;<br/>Females</b> |                    | <b>Count<br/>density</b> | <b>ROI<br/>area</b> |                   |             |             |      |
| <b>sex<br/>(Normal)</b>        | <b>GAD65</b>       | <b>p value</b>           | <b>p value</b>      |                   |             |             |      |
|                                | Field L            | 0.36                     | 0.15                |                   |             |             |      |
|                                | NCM                | 0.44                     | 0.64                |                   |             |             |      |
|                                | CM                 | 0.44                     | 0.93                |                   |             |             |      |
|                                | HVC                | 0.08                     | <b>0.001</b>        |                   |             |             |      |
|                                | RA                 | 0.18                     | <b>0.007</b>        |                   |             |             |      |
|                                | LMAN               | 0.83                     | 0.74                |                   |             |             |      |
|                                |                    |                          |                     |                   |             |             |      |
| <b>sex<br/>(Normal)</b>        | <b>parvalbumin</b> |                          |                     |                   |             |             |      |
|                                | Field L            | 0.40                     | 0.06                |                   |             |             |      |
|                                | NCM                | 0.86                     | 0.82                |                   |             |             |      |
|                                | CM                 | 0.67                     | 0.31                |                   |             |             |      |
|                                | HVC                | <b>0.02</b>              | <b>&lt;0.001</b>    |                   |             |             |      |
|                                | RA                 | <b>&lt;0.001</b>         | <b>&lt;0.001</b>    |                   |             |             |      |
|                                | LMAN               | 0.30                     | 0.08                |                   |             |             |      |
